# Supplementary material
Source: PubMed Central journal article supplement (PMC1829267)

Relative Abundance

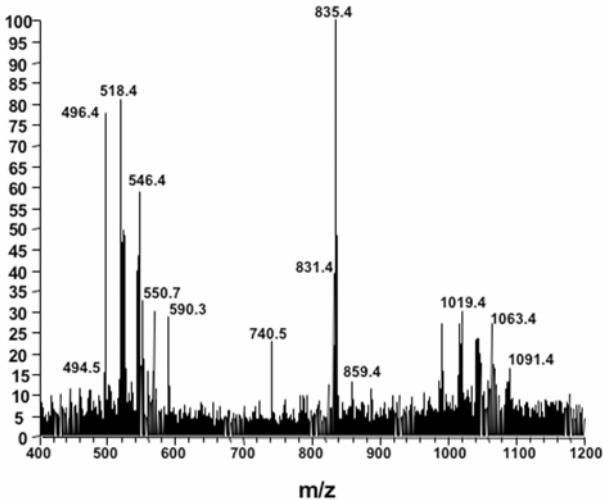

Supplement: pnas_0700547104_1.pdf [file pnas_0700547104_1.pdf]

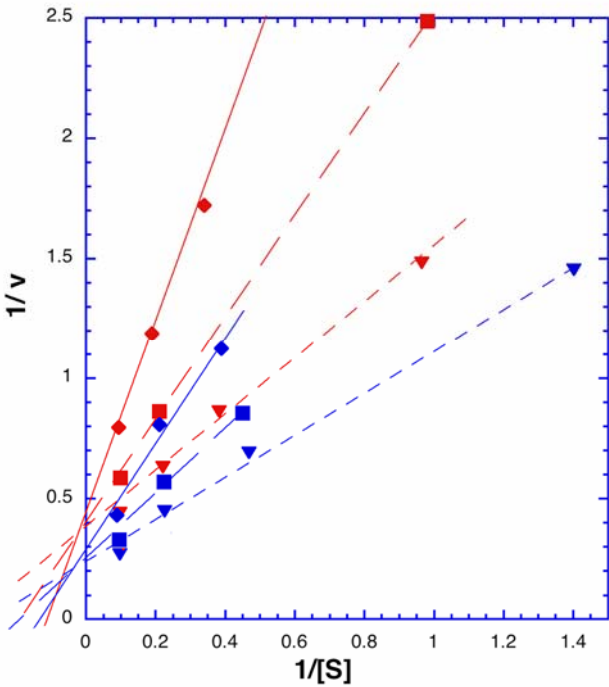

Supplement: pnas_0700547104_2.pdf [file pnas_0700547104_2.pdf]
